# Supplementary material
Source: PubMed Central journal article supplement (PMC3158280)
Supplement: NIHMS314809-supplement-1_si_001.pdf [file NIHMS314809-supplement-1_si_001.pdf]

# Solid-State NMR Spectroscopy Provides Atomic-level Insights Into the Dehydration of Cartilage

Jiadi Xu<sup>a,b</sup>, Peizhi Zhu<sup>b</sup>, Michael D. Morris<sup>b\*</sup>, and Ayyalusamy Ramamoorthy<sup>a,b\*</sup>

<sup>a</sup>Biophysics and <sup>b</sup>Department of Chemistry, University of Michigan, Ann Arbor, MI 48109-1055

## Supporting Information

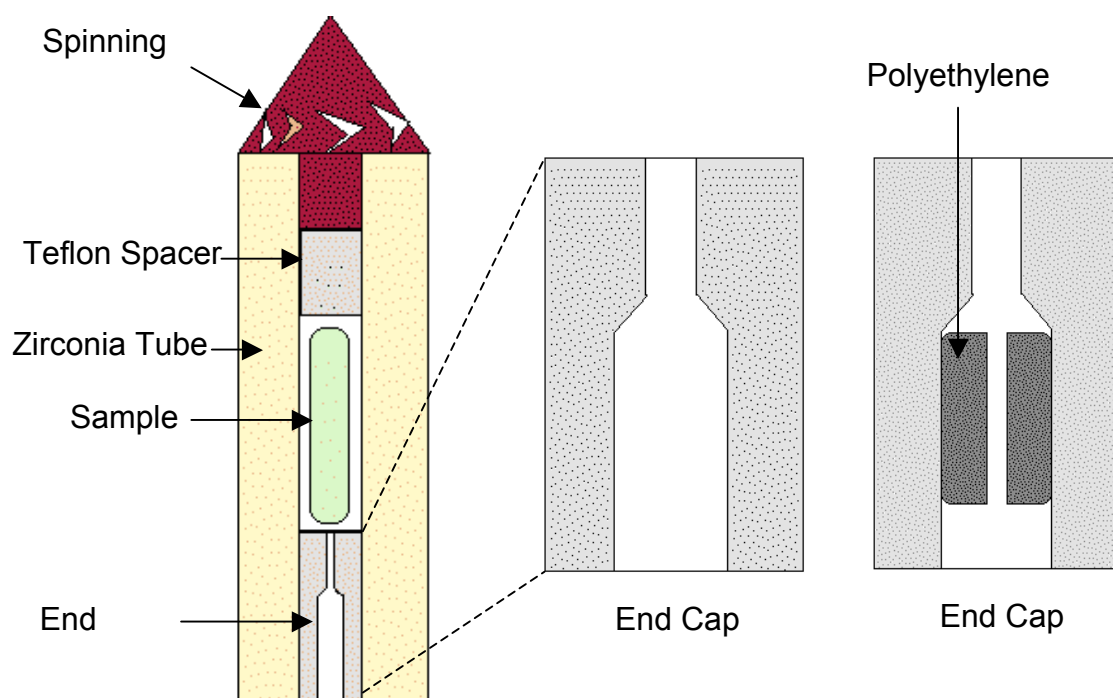

**Figure S1.** A sketch of NMR rotor and insert for a controlled slow dehydration of cartilage samples used in this study.

### *Raman microspectroscopy*

A Nikon E600 epi-fluorescence microscope (Nikon, Inc., Melville, New York) was modified for NIR Raman spectroscopy in house. A 785-nm Kaiser Invictus laser was line focused (Kaiser Optical Systems, Inc., Ann Arbor, Michigan) onto cartilage specimen using a 20×/0.75 NA S Fluor objective. Raman-scattered light was dispersed through a spectrograph (HoloSpec f/1.8, Kaiser Optical Systems, Inc.) and collected for 10 min on a charge-coupled device (CCD) detector optimized for NIR wavelengths (DU401-BR-DD, Andor Technologies, Belfast, Northern Ireland). Because the instrument used a line focused laser, 126 Raman spectra were simultaneously collected on the specimen (Figure S2). Raman data were imported into MATLAB

software (v. 7.0, The Math Works, Natick, Massachusetts) and corrected for image curvature, dark current, and variations in the CCD quantum efficiency.

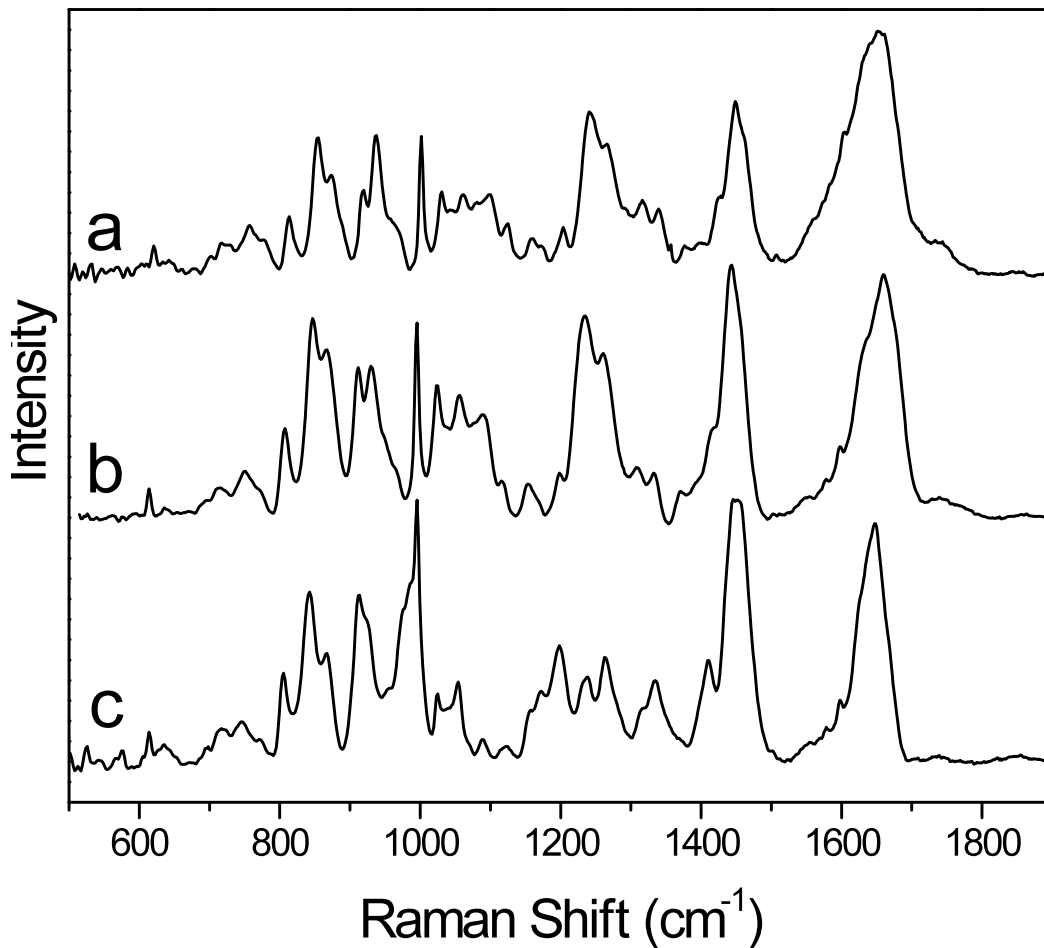

**Figure S2.** Raman spectra of (a) hydrated, (b) dehydrated, and (c) D<sub>2</sub>O exchanged bovine cartilage contain contributions primarily from collagen protein with minor bands assigned to chondroitin sulfate. Dehydration or D<sub>2</sub>O-exchange had a pronounced effect on collagen carbonyl groups, as evidenced in the amide I envelope at 1600-1700 cm<sup>-1</sup>. The amide I envelope becomes narrower, reflecting a loss of intermolecular hydrogen bonding.

**Table S1.** Assignment of  $^{13}\text{C}$  peaks from the RAMP-CP spectrum of hydrated cartilage.

| Chemical Shift relative to TMS, $\delta_{\text{C}}$ (ppm) |            | Assignment                            |                |
|-----------------------------------------------------------|------------|---------------------------------------|----------------|
| Hydrated                                                  | Dehydrated | Functional Group                      | Type of Carbon |
| 182.1,175.1,<br>171,168.7                                 | 175.9      | Carboxylate, Carbonyl                 | C=O            |
| 157.9                                                     | 161.2      | Arg C $_{\delta}$                     | CH             |
| 129.7                                                     | 130        | His,Phe,Trp,Tyr ring                  | CH             |
| 103.7,101.7                                               | 105        | GAGs C1                               |                |
| 76.2                                                      | 74.2       | GAGs                                  | CH $_2$        |
| 71.1                                                      | 71.2       | Hyp C $_{\gamma}$                     | CH             |
| 62.0                                                      |            | Ser C $_{\beta}$ ; Val C $_{\alpha}$  | CH             |
| 59.5                                                      | 59.3       | Pro C $_{\alpha}$ ; Hyp C $_{\alpha}$ | CH             |
| 54.4                                                      | 52.9       | Hyp C $_{\delta}$ ; Glu C $_{\alpha}$ | CH             |
| 49.8                                                      | 49.2       | Ala C $_{\alpha}$                     | CH             |
| 47.8                                                      | 47.6       | Pro C $_{\delta}$                     | CH $_2$        |
| 43.0                                                      | 42.6       | Gly C $_{\alpha}$ ; Arg C5            | CH $_2$        |
| 38.2                                                      |            | Hyp C $_{\beta}$ , Asp C $_{\beta}$   | CH $_2$        |
| 34.7                                                      |            | Val C $_{\gamma}$                     |                |
| 30.5                                                      | 29.7       | Pro C $_{\beta}$ , Arg C $_{\beta}$   | CH $_2$        |
| 28.9                                                      |            | Glu C $_{\gamma}$ ; Lys C $_{\beta}$  | CH $_2$        |
| 25.3                                                      | 24.2       | Pro C $_{\gamma}$ ; Glu C $_{\beta}$  | CH $_2$        |
| 17.5                                                      | 16.3       | Ala C $_{\beta}$                      | CH $_3$        |

**Table S2.** Assignment of  $^{13}\text{C}$  peaks from the RINEPT spectrum of cartilage.

| Chemical shift relative to TMS (ppm) | Carbon       | Type of Carbon |
|--------------------------------------|--------------|----------------|
| 102.5,100.1                          | C1           | CH             |
| 50.0                                 | C2           | CH             |
| 75.5                                 | C3,          | CH             |
| 79                                   | C4           | CH             |
| 71.4,72.7                            | C5           | CH             |
| 66.6,60.1                            | C6           | CH             |
| 21.6                                 | -NHCOCH $_3$ | CH $_3$        |
